# Supplementary material
Source: Springer Nature journal article supplement (https://www.springermedizin.de/resource/supplementary/13075_2012_3571_MOESM1_ESM.pdf/9694850)
Supplement: MOESM1 [file 9694850]

**A**

DAPI

H4Cit3-Alexa488

Overlay

WT  
Ankle  
K/BxN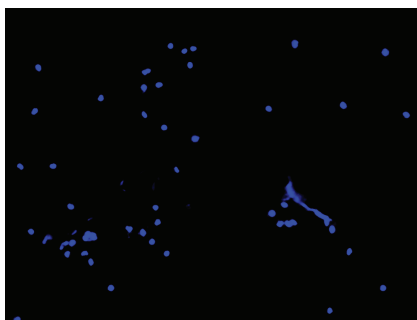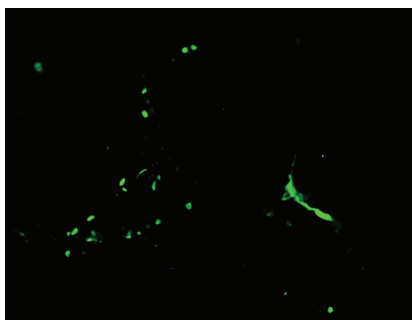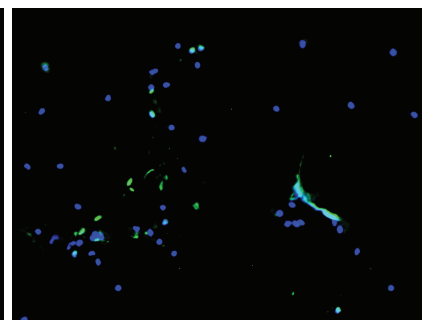PAD4KO  
Ankle  
K/BxN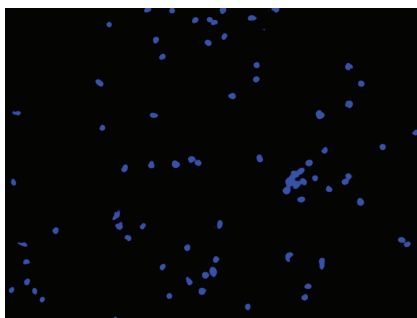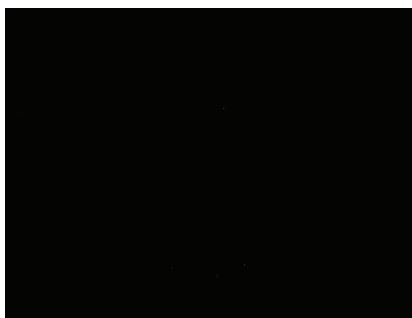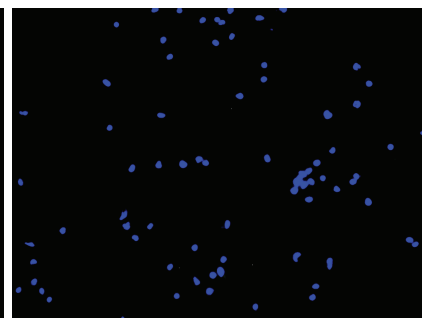WT  
Ankle  
Control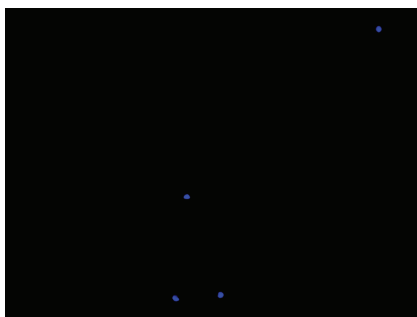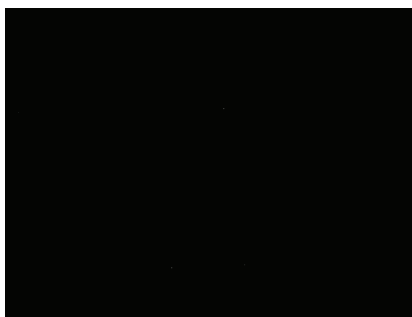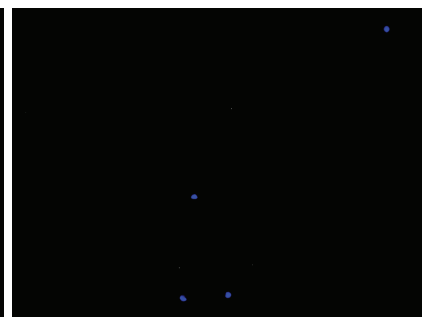**B**WT  
Peripheral  
Blood  
K/BxN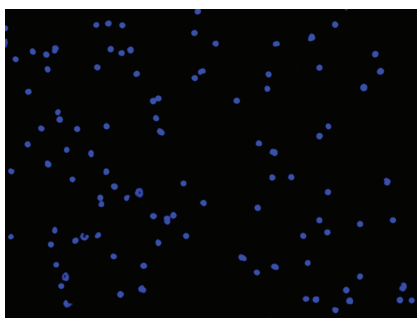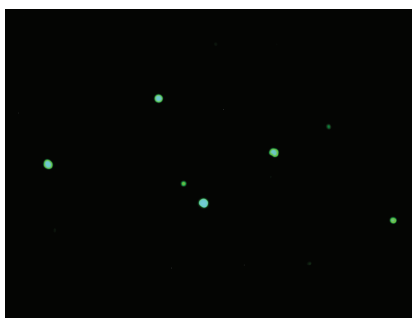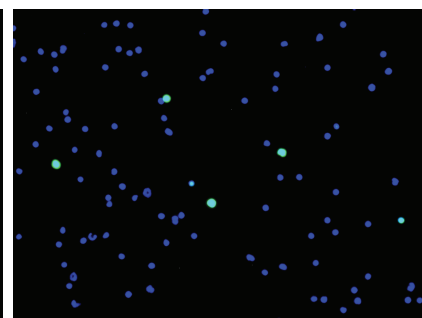PAD4 KO  
Peripheral  
Blood  
K/BxN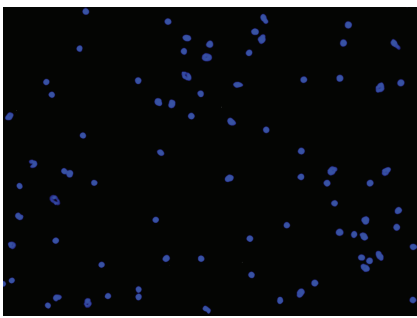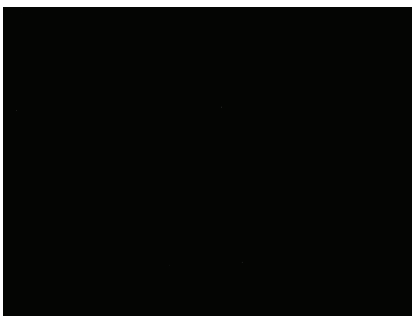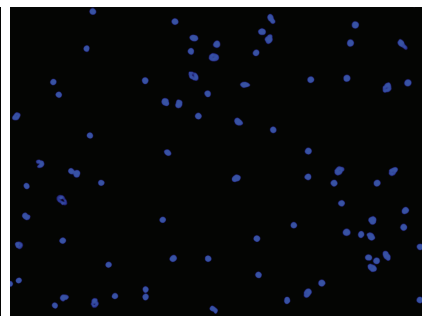WT  
Peripheral  
Blood  
Control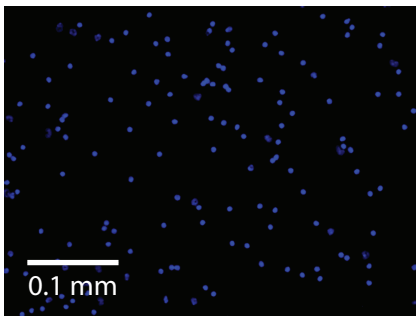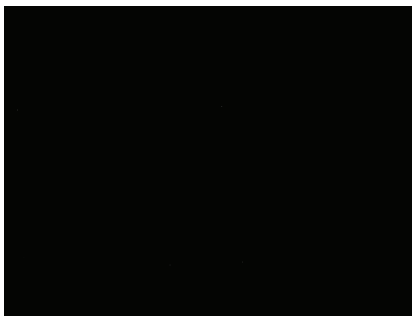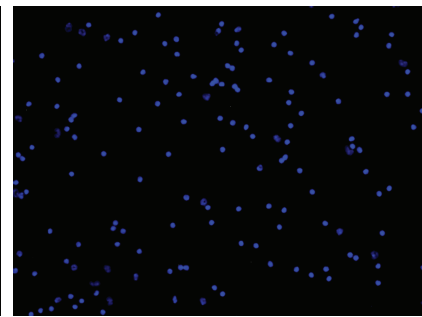

0.1 mm
